# Supplementary material for: Disintegration of aerobic granules during prolonged operation
Source: Royal Society of Chemistry journal article supplement (doi:10.1039/c7ew00072c), 2017-01-01
Supplement: c7ew00072c1.pdf [file c7ew00072c1.pdf]

**Supplementary material**

for

**Disintegration of aerobic granules during prolonged operation**

Shasha Yuan <sup>a</sup>, Mingming Gao <sup>a</sup>, Fanping Zhu <sup>a</sup>, Muhammad Zaheer Afzal <sup>a</sup>, Yun-Kun Wang <sup>a</sup>,

Hai Xu <sup>b</sup>, Mingyu Wang <sup>b</sup>, Shu-Guang Wang <sup>a</sup>, Xin-Hua Wang <sup>a,\*</sup>

<sup>a</sup> Shandong Provincial Key Laboratory of Water Pollution Control and Resource Reuse, School of Environmental Science and Engineering, Shandong University, Jinan 250100, China

<sup>b</sup> State Key Laboratory of Microbial Technology, School of Life Sciences, Shandong University, Jinan 250100, China

\*Corresponding author. School of Environmental Science and Engineering, Shandong University, Jinan 250100, China. Tel.: +86 531 88362220; Fax: +86 531 88364513.

*E-mail address:* xinhuaawang@sdu.edu.cn ([X.H. Wang](mailto:xinhuaawang@sdu.edu.cn)).

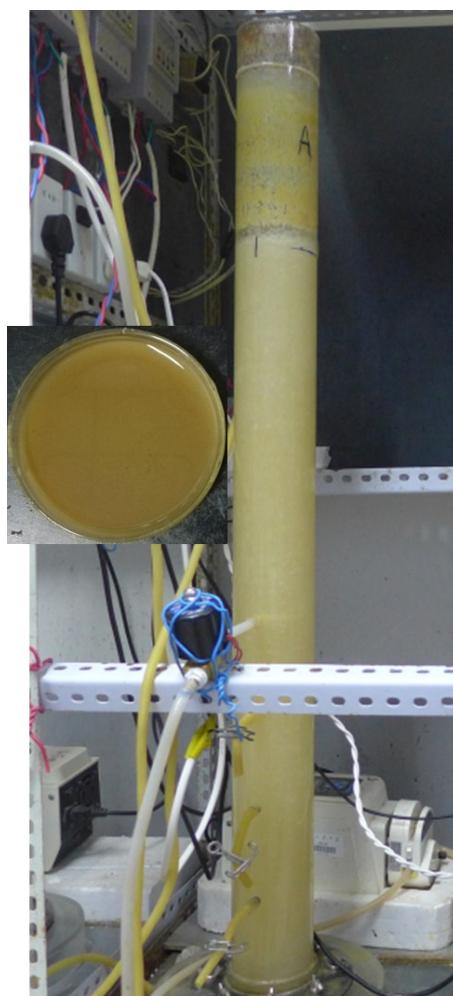

**Fig. S1** Sequencing batch reactor and seed sludge.

**Table S1** Basic element and trace element of synthetic wastewater

| Basic element                             | Concentration (mg/L) | Trace element                                       | Concentration (mg/L) |
|-------------------------------------------|----------------------|-----------------------------------------------------|----------------------|
| $\text{C}_6\text{H}_{12}\text{O}_6$       | 468.7                | $\text{MnCl}_2 \cdot 4\text{H}_2\text{O}$           | 0.12                 |
| $\text{CH}_3\text{COONa}$                 | 640.6                | $\text{H}_3\text{BO}_3$                             | 0.15                 |
| $\text{NH}_4\text{Cl}$                    | 382.1                | $\text{CuSO}_4 \cdot 5\text{H}_2\text{O}$           | 0.03                 |
| $\text{CaCl}_2$                           | 166.5                | $\text{KI}$                                         | 0.03                 |
| $\text{KH}_2\text{PO}_4$                  | 22.1                 | $\text{ZnCl}_2$                                     | 0.12                 |
| $\text{MgSO}_4 \cdot 7\text{H}_2\text{O}$ | 25.3                 | $\text{CoCl}_2 \cdot 6\text{H}_2\text{O}$           | 0.06                 |
| $\text{FeSO}_4 \cdot 7\text{H}_2\text{O}$ | 20.3                 | $\text{Na}_2\text{MoO}_4 \cdot 2\text{H}_2\text{O}$ | 0.15                 |
| EDTA                                      | 20.4                 |                                                     |                      |
| $\text{FeCl}_3 \cdot 6\text{H}_2\text{O}$ | 1.5                  |                                                     |                      |

**Table S2** Stains used in staining operation

| Dyes                                  | Excitation (nm) | Emission (nm) | Targets                                                 | Staining time (h) |
|---------------------------------------|-----------------|---------------|---------------------------------------------------------|-------------------|
| SYTO 9                                | 488             | 530           | Live cells                                              | 1                 |
| Propidium iodide                      | 488             | 630           | Dead cells                                              | 1                 |
| SYPRO orange                          | 488             | 570           | proteins                                                | 4                 |
| Con A with Alexa Flour 633 conjugates | 633             | 647           | Polysaccharides ( $\alpha$ -Mannose, $\alpha$ -Glucose) | 4                 |

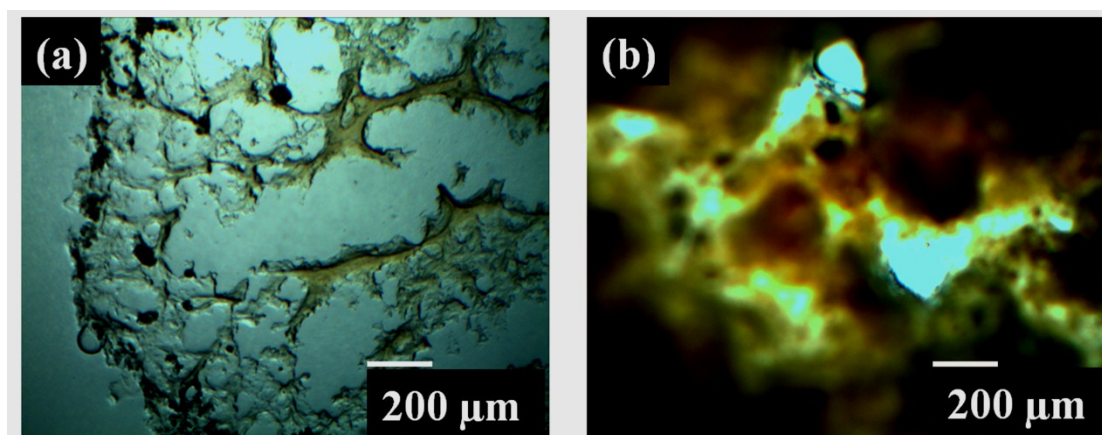**Fig. S2** Graphs of (a) edge section (thickness of 50  $\mu\text{m}$ ) and (b) inner core section (thickness of 200  $\mu\text{m}$ ) of intact aged granules ( $\text{IG}_\text{A}$ ).**Table S3** Percentage of Ca precipitation in different part of intact young granules ( $\text{IG}_\text{Y}$ ) and intact aged granules ( $\text{IG}_\text{A}$ ) (Part 1: outer zones of cross-section in intact granules; Part 2: middle zones of cross-section in intact granules; Part 3: core of cross-section in intact granules)

| Ca (%)               | Part 1          | Part 2          | Part 3           |
|----------------------|-----------------|-----------------|------------------|
| $\text{IG}_\text{Y}$ | $1.09 \pm 0.43$ | $6.92 \pm 0.56$ | $13.72 \pm 2.29$ |
| $\text{IG}_\text{A}$ | $6.92 \pm 0.56$ | $9.05 \pm 0.32$ | $4.19 \pm 0.90$  |

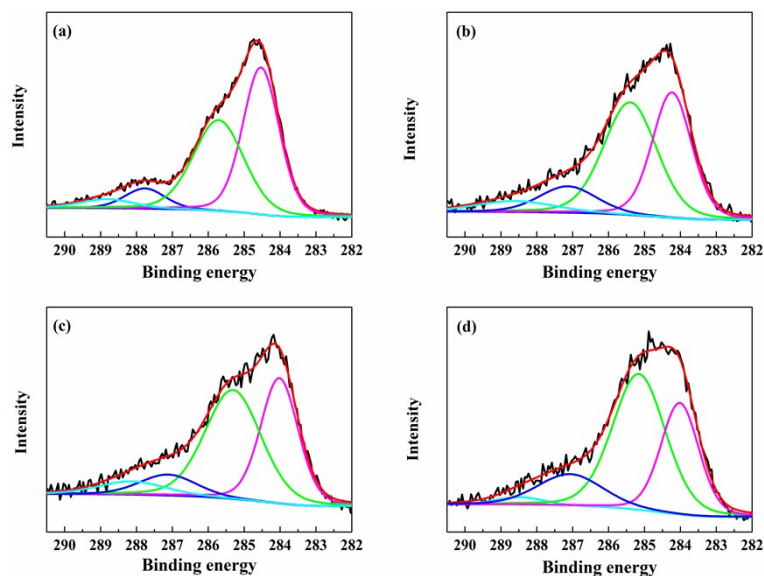

**Fig. S3** High-resolution C 1s XPS spectra of EPS from (a) intact young granules (IG<sub>Y</sub>), (b) intact aged granules (IG<sub>A</sub>), (c) crannied granules (CG) and (d) broken granules (BG).

**Table S4** Microbial community diversity and richness of intact young granules (IG<sub>Y</sub>), intact aged granules (IG<sub>A</sub>), crannied granules (CG) and broken granules (BG)

| Samples         | Level | OTUs | Chao index | Shannon index | Coverage |
|-----------------|-------|------|------------|---------------|----------|
| IG <sub>Y</sub> | 97%   | 1216 | 1171       | 6.68          | 99.91%   |
| IG <sub>A</sub> |       | 1292 | 1035       | 5.44          | 99.83%   |
| CG              |       | 1301 | 1132       | 5.85          | 99.94%   |
| BG              |       | 1289 | 1129       | 5.75          | 99.93%   |

Chao index: Community richness. A higher number represented more richness.  
Shannon index: Community diversity. A higher number represented more diversity.

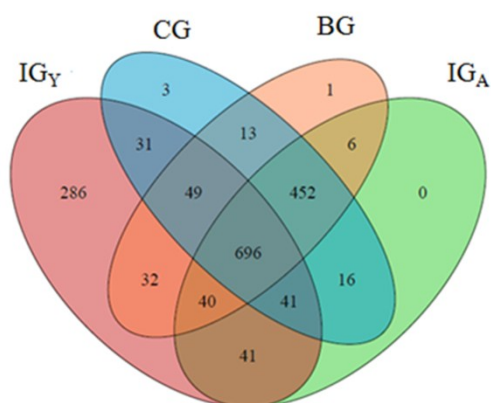

**Fig. S4** Venn diagram of intact young granules (IG<sub>Y</sub>), intact aged granules (IG<sub>A</sub>), crannied granules (CG) and broken granules (BG).

**Table S5** Shared OTUs percentage of intact young granules (IG<sub>Y</sub>), aged young granules (IG<sub>A</sub>), crannied granules (CG) and broken granules (BG).

| samples                                | Shared OTUs percentage (%) |
|----------------------------------------|----------------------------|
| All                                    | 13.66                      |
| IG <sub>Y</sub> , IG <sub>A</sub> & CG | 19.35                      |
| IG <sub>Y</sub> , IG <sub>A</sub> & BG | 19.38                      |
| IG <sub>Y</sub> , CG & BG              | 19.57                      |
| IG <sub>A</sub> , CG & BG              | 29.57                      |
| IG <sub>Y</sub> & IG <sub>A</sub>      | 32.67                      |
| IG <sub>Y</sub> & CG                   | 32.46                      |
| IG <sub>Y</sub> & BG                   | 32.61                      |
| IG <sub>A</sub> & CG                   | 46.47                      |
| IG <sub>A</sub> & BG                   | 46.26                      |
| CG & BG                                | 46.72                      |

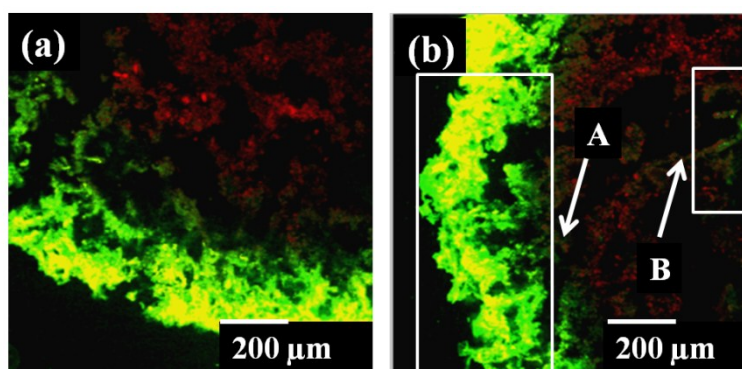

**Fig. S5** CLSM image of live/dead cell spatial distribution over section of (a) intact aged granules (IG<sub>A</sub>), (b) broken granules (BG) (A: outer side; B: broken surface) (Live cells were stained with green; dead cells were stained with red).
